# Supplementary material
Source: Springer Nature journal article supplement (https://www.springermedizin.de/resource/supplementary/12889_2012_4549_MOESM4_ESM.pdf/9492186)

Kcal/Kg·day<sup>-1</sup>

## GIRLS

INTERVENTION (n=43)

CONTROL (n=41)

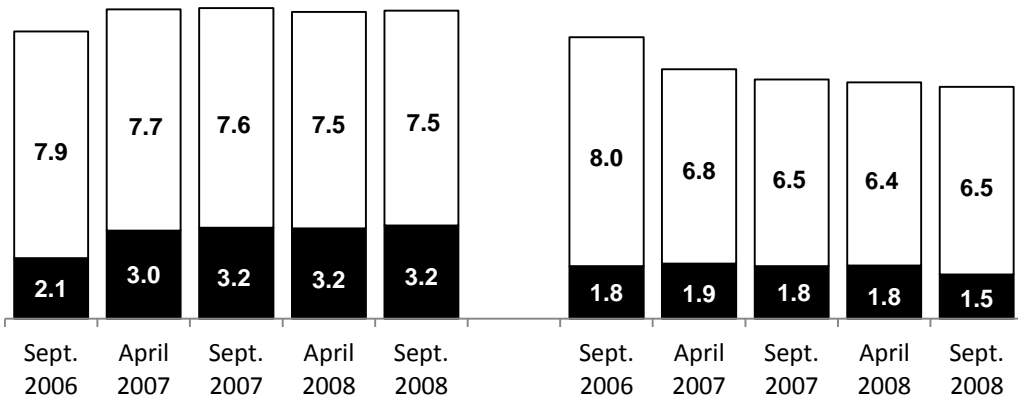

Kcal/Kg·day<sup>-1</sup>

## BOYS

INTERVENTION (n=45)

CONTROL (n=47)

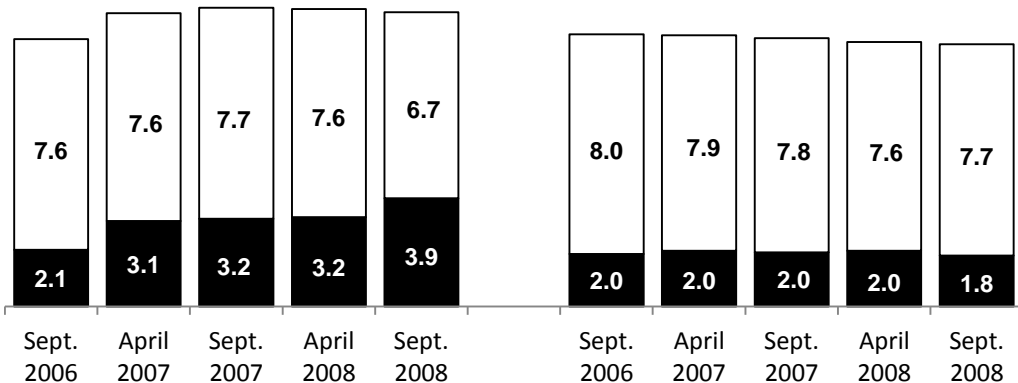

Supplement: MOESM4 [file 9492186]
